# Supplementary material
Source: publisher figshare collection journal article supplement (https://tandf.figshare.com/ndownloader/files/23613595)
Supplement: Supplementary file 1 [file 23613595]

**Appendix**

**Familial Mediterranean Fever Quality of Life Scale (FMFQoL)**

**Turkish Version of FMFQoL**

**Ailevi Akdeniz Ateşi Yaşam Kalitesi Ölçütü (FMFYK)**

| **1- Gece yeterli saat uyuma** | □ | □ | □ | □ | □ |
| --- | --- | --- | --- | --- | --- |
| **2- Sabah dinlenmiş olarak uyanma** | □ | □ | □ | □ | □ |
| **3- Alışveriş poşetlerini taşıma** | □ | □ | □ | □ | □ |
| **4- Uzun süre ayakta sabit durma** | □ | □ | □ | □ | □ |
| **5- Evde kendi sorumluluğunuzda olan işleri yapma** | □ | □ | □ | □ | □ |
| **6- Başladığınız günlük ev işlerinizi vaktinde bitirme** | □ | □ | □ | □ | □ |
| **7- Arkadaş toplantılarına gitme** | □ | □ | □ | □ | □ |
| **8- Başkalarının planlarına katılma** | □ | □ | □ | □ | □ |
| **9- Gerektiğinde kısa mesafe koşma** | □ | □ | □ | □ | □ |
| **10- Birkaç sokak mesafeyi yürüme** | □ | □ | □ | □ | □ |
| **11- Arkadaşları ziyaret etme** | □ | □ | □ | □ | □ |
| **12- Sokakta dolaşma, gezintiye çıkma** | □ | □ | □ | □ | □ |
| **13- Birkaç kat merdiven inip çıkma** | □ | □ | □ | □ | □ |
| **14- Ailenizden gereksiniminiz olan desteği alma** | □ | □ | □ | □ | □ |
| **15- Arkadaşlarınızdan gereksiniminiz olan desteği alma** | □ | □ | □ | □ | □ |
| **16- Yardım almadan günlük işlerinizi yapma** | □ | □ | □ | □ | □ |
| **17- Geleceğe umutla bakma** | □ | □ | □ | □ | □ |
| **18- Yerdeki bir şeyi almak için öne eğilme** | □ | □ | □ | □ | □ |
| **19- Yüksek bir yerdeki bir şeye uzanma ve alma** | □ | □ | □ | □ | □ |
| **20- Yeni şeyler öğrenme** | □ | □ | □ | □ | □ |
| **Total skor: I__I__I** | | | | | |

**Sadece** Ailesel Akdeniz ateşinin (AAA), size olan etkilerini düşünerek, başka etkileri dışlayarak aşağıdaki aktiviteleri **istediğiniz düzeyde** yapabiliyor musunuz? Sizin için uygun olan seçeneği işaretleyiniz.

|  | **Tamamen**  **yapıyorum**  **0** | **Çoğunlukla**  **yapıyorum**  **1** | **Orta düzeyde**  **yapıyorum**  **2** | **Çok az**  **yapıyorum**  **3** | **Hiç**  **yapamıyorum**  **4** |
| --- | --- | --- | --- | --- | --- |
